# Supplementary material
Source: PubMed Central journal article supplement (PMC55523)
Supplement: pnas_171251798_1.pdf [file pnas_171251798_1.pdf]

**Table 2. Sequences of RNA oligonucleotides**

| RNA oligonucleotide           | Sequence                                                                                                                                     |
|-------------------------------|----------------------------------------------------------------------------------------------------------------------------------------------|
| <i>egfp</i> 21-nt sense       | 5' PO <sub>4</sub> r(gac gua aac ggc cac aag uuc) 3' OH (nt 64–nt 84)                                                                        |
| <i>egfp</i> 21-nt antisense   | 5' PO <sub>4</sub> r(acu ugu ggc cgu uua cgu cgc) 3' OH (nt 62–nt 82)                                                                        |
| <i>egfp</i> 22-nt sense       | 5' PO <sub>4</sub> r(gca agc uga ccc uga agu uca u) 3' OH (nt 122–nt 143)                                                                    |
| <i>egfp</i> 22-nt antisense   | 5' PO <sub>4</sub> r(gaa cuu cag ggu cag cuu gcc g) 3' OH (nt 120–nt 141)                                                                    |
| <i>egfp</i> 23-nt sense       | 5' PO <sub>4</sub> r(agc agc acg acu ucu uca agu cc) 3' OH (nt 239–nt 261)                                                                   |
| <i>egfp</i> 23-nt antisense   | 5' PO <sub>4</sub> r(acu uga aga agu cgu gcu gcu uc) 3' OH (nt 237–nt 259)                                                                   |
| <i>egfp</i> 24-nt sense       | 5' PO <sub>4</sub> r(cau cuu cuu caa gga cga cgg caa) 3' OH (nt 294–nt 317)                                                                  |
| <i>egfp</i> 24-nt antisense   | 5' PO <sub>4</sub> r(gcc guc guc cuu gaa gaa gau ggu) 3' OH (nt 292–nt 315)                                                                  |
| <i>egfp</i> 25-nt sense       | 5' PO <sub>4</sub> r(gca caa gcu gga gua caa cua caa c) 3' OH (nt 417–nt 441)                                                                |
| <i>egfp</i> 25-nt antisense   | 5' PO <sub>4</sub> r(ugu agu ugu acu cca gcu ucu gcc c) 3' OH (nt 415–nt 439)                                                                |
| <i>egfp</i> 26-nt sense       | 5' PO <sub>4</sub> r(cga caa gca gaa gaa cgg cau caa gg) 3' OH (nt 465–nt 490)                                                               |
| <i>egfp</i> 26-nt antisense   | 5' PO <sub>4</sub> r(uug aug ccg uuc uuc ugc uug ucg gc) 3' OH (nt 463–nt 488)                                                               |
| <i>egfp</i> 27-nt sense       | 5' PO <sub>4</sub> r(cuu caa gau ccg cca caa cau cga gga) 3' OH (nt 495–nt 521)                                                              |
| <i>egfp</i> 27-nt antisense   | 5' PO <sub>4</sub> r(cuc gau guu gug gcg gau cuu gaa guu) 3' OH (nt 493–nt 519)                                                              |
| <i>cat</i> 22-nt sense        | 5' PO <sub>4</sub> r(gag uga aua cca cga cga uuu c) 3' OH (nt 318–nt 339)                                                                    |
| <i>cat</i> 22-nt antisense    | 5' PO <sub>4</sub> r(aau cgu cgu ggu auu cac ucc a) 3' OH (nt 316–nt 337)                                                                    |
| <i>cat</i> 23-nt sense        | 5' PO <sub>4</sub> r(gga gug aau acc acg acg auu uc) 3' OH (nt 317–nt 339)                                                                   |
| <i>cat</i> 23-nt antisense    | 5' PO <sub>4</sub> r(gga gug aau acc acg acg auu uc) 3' OH (nt 315–nt 337)                                                                   |
| <i>unc22</i> 23-nt sense      | 5' PO <sub>4</sub> r(ucu guc ucu gcu ccu cuc ggc gg) 3' OH (nt 17893–nt 17915)                                                               |
| <i>unc22</i> 23-nt antisense  | 5' PO <sub>4</sub> r(gcc gag agg agc aga gac aga gg) 3' OH (nt 17891–nt 17913)                                                               |
| <i>unc22</i> 24-nt sense      | 5' PO <sub>4</sub> r(cuc ugu cuc ugc ucc ucu cgg cgg) 3' OH (nt 17892–nt 17915)                                                              |
| <i>unc22</i> 24-nt antisense  | 5' PO <sub>4</sub> r(gcc gag agg agc aga gac aga gga) 3' OH (nt 17890–nt 17913)                                                              |
| <i>unc22</i> 25-nt sense      | 5' PO <sub>4</sub> r(ccu cug ucu cug cuc cuc ucg gcg g) 3' OH (nt 17891–nt 17915)                                                            |
| <i>unc22</i> 25nt antisense   | 5' PO <sub>4</sub> r(gcc gag agg agc aga gac aga gga u) 3' OH (nt 17889–nt 17913)                                                            |
| <i>egfp</i> 78-nt sense       | 5' r(cua cgu cca gga gcg cac cau cuu cuu caa gga cga cgg caa cua caa gac ccg cgc cga ggu gaa guu cga ggg cga) 3' (nt 276–nt 354)             |
| <i>egfp</i> 78-nt antisense   | 5' r(ucg ccc ucg aac uuc acc ucg gcg cgg guc uug uag uug ccg ucg ucc uug aag aag aug gug cgc ucc ugg acg uag) 3' (nt 276–nt 354)             |
| <i>cat</i> 78-nt sense        | 5' r(cau cgc ucu gga gug aau acc acg acg auu ucc ggc agu uuc uac aca uau auu cgc aag aug ugg cgu guu acg gug) 3' (nt 313 – nt 392)           |
| <i>cat</i> 78-nt antisense    | 5' r(cac cgu aac acg cca cau cuu gcg aau aua ugu gua gaa acu gcc gga aau cgu cgu ggu auu cac ucc aga gcg aug) 3' (nt 313–nt 392)             |
| <i>unc</i> 22 81-nt sense     | 5' r(gug cuc gga aaa cca ucu agc cca uug gga ccu uug gaa gug ucg aau guc uac gaa gau cgc gca gau uug gag ugg aaa) 3' (nt 4096–nt 4176)       |
| <i>unc</i> 22 85-nt antisense | 5' r(gua cuu ucc acu cca aau cug cgc gau cuu cgu aga cau ucg aca cuu cca aag guc cca aug ggc uag aug guu uuc cga gca c) 3' (nt 4096–4181 nt) |
| <i>LacZ</i> 81-nt sense       | 5' r(agg ucc ugc acu gga ugg ugg cgc ugg aug gua agc cgc ugg caa gcg gug aag ugc cuc ugg aug ucg cuc cac aag gua) 3' (nt 1946–nt 2027)       |
| <i>LacZ</i> 81-nt antisense   | 5' r(uac cuu gug gag cga cau cca gag gca cuu cac cgc uug cca gcg gcu uac cau cca gcg cca cca ucc agu gca gga gcu) 3' (nt 1946–nt 2027)       |

Sequence positions refer to the 719-nt coding region of *egfp* gene, the 675-nt coding region of the *cat* gene, the 3,066-nt coding region of the  $\beta$ -galactosidase gene, and the 18,147-nt coding of the *C. elegans unc22* gene.
